# Supplementary material for: Search for Synergistic Drug Combinations to Treat Chronic Lymphocytic Leukemia
Source: MDPI journal article supplement (doi:10.3390/cells11223671), 2022-11-18
Supplement: s1 [file s1]

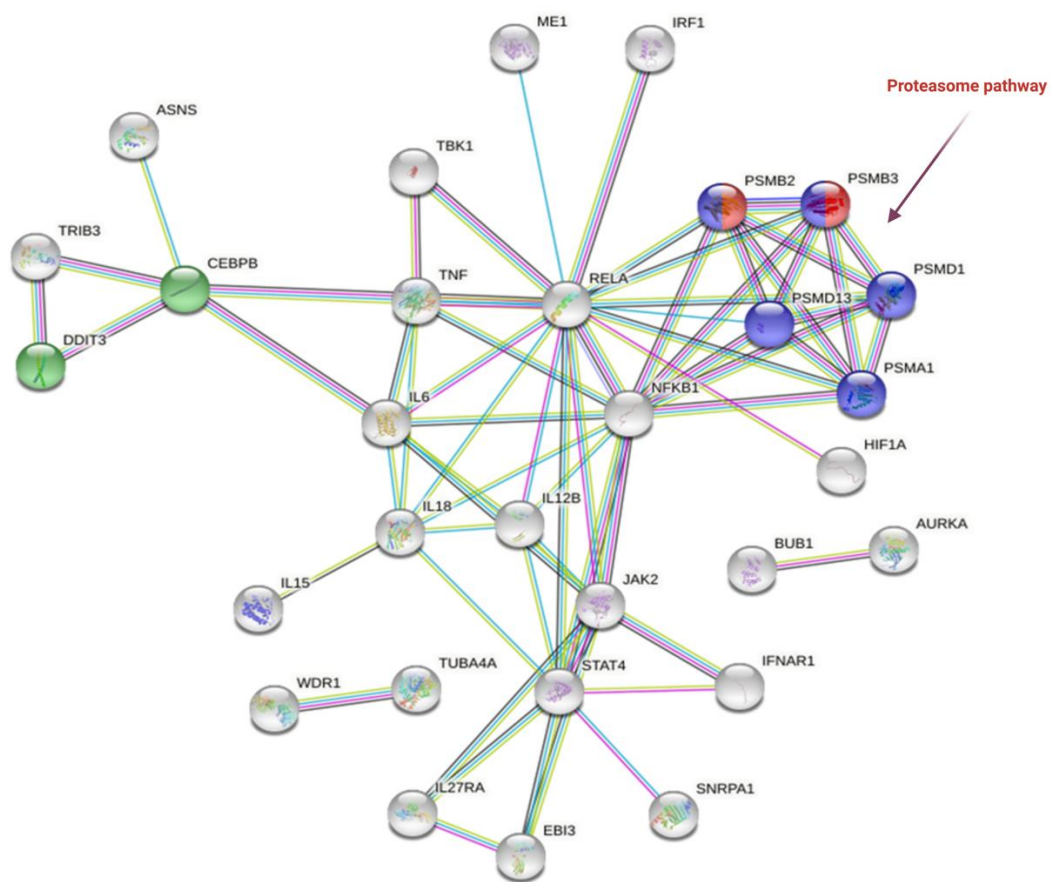

| *GO-term   | description                                   | Count in network | Strength | False discovery rate |
|------------|-----------------------------------------------|------------------|----------|----------------------|
| GO:0036488 | CHOP-C/EBP complex                            | 2/2              | 2.7      | 0.0027               |
| GO:0033256 | I-KappaB/NF-kappaB complex                    | 2/7              | 2.16     | 0.0124               |
| GO:0019774 | Proteasome core complex, beta-subunit complex | 2/11             | 1.96     | 0.0240               |
| GO:0005839 | Proteasome core complex                       | 3/20             | 1.88     | 0.0027               |
| GO:0000502 | Proteasome complex                            | 5/62             | 1.61     | 0.00018              |
| GO:0000775 | Chromosome centromere region                  | 4/193            | 1.02     | 0.0456               |

\* Cellular Component (Gene ontology).

**Figure S1.** STRING network analysis of genes that were involved in pathways identified by GSEA. The proteasome pathway is highlighted.

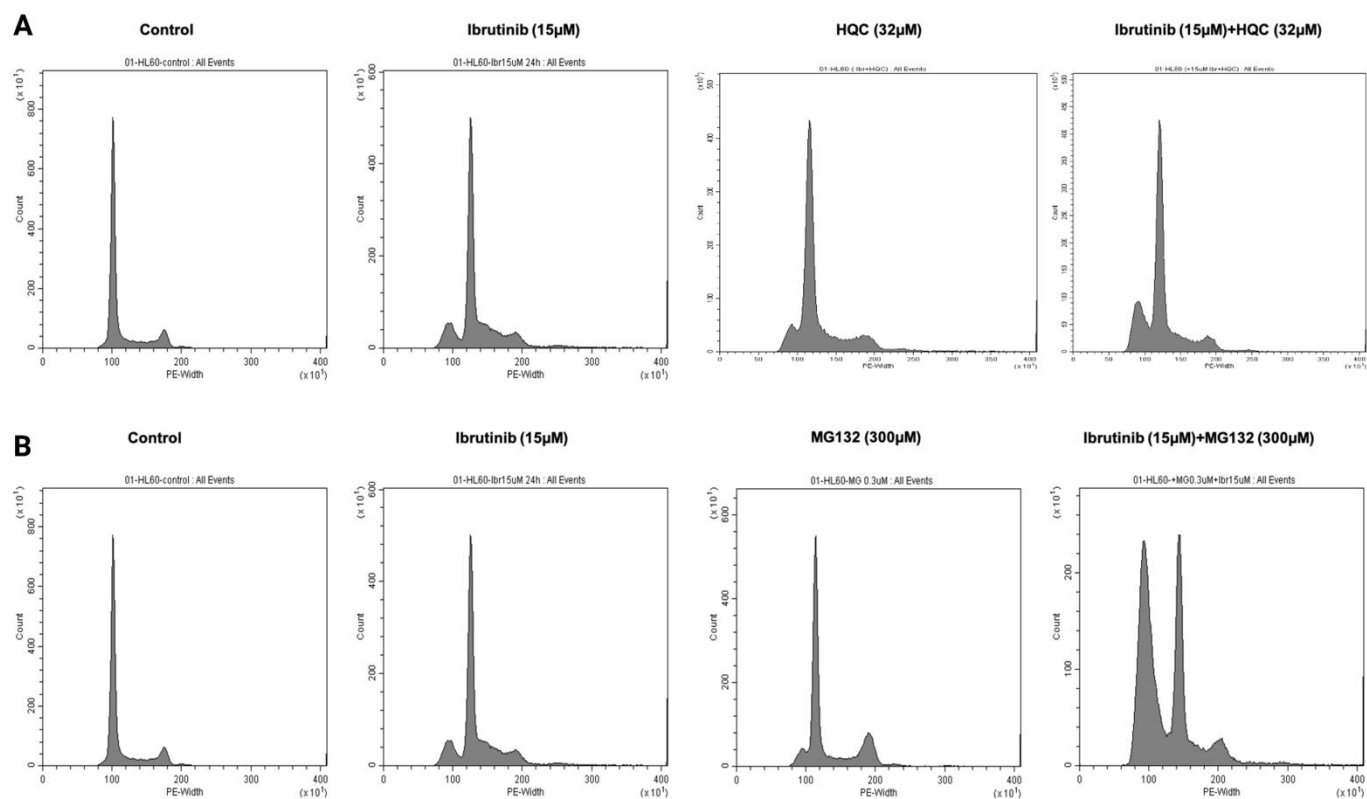

**Figure S2.** FACS quantification for Control (Untreated), Ibrutinib (15uM), and combination of Ibrutinib with HQC and MG132, raw data sub-G1 in experiments described in Fig. 1B for HL-60 cell line. Here for representation, the data for control and Ibrutinib has been used twice (The first 2 images in the up and down panel).

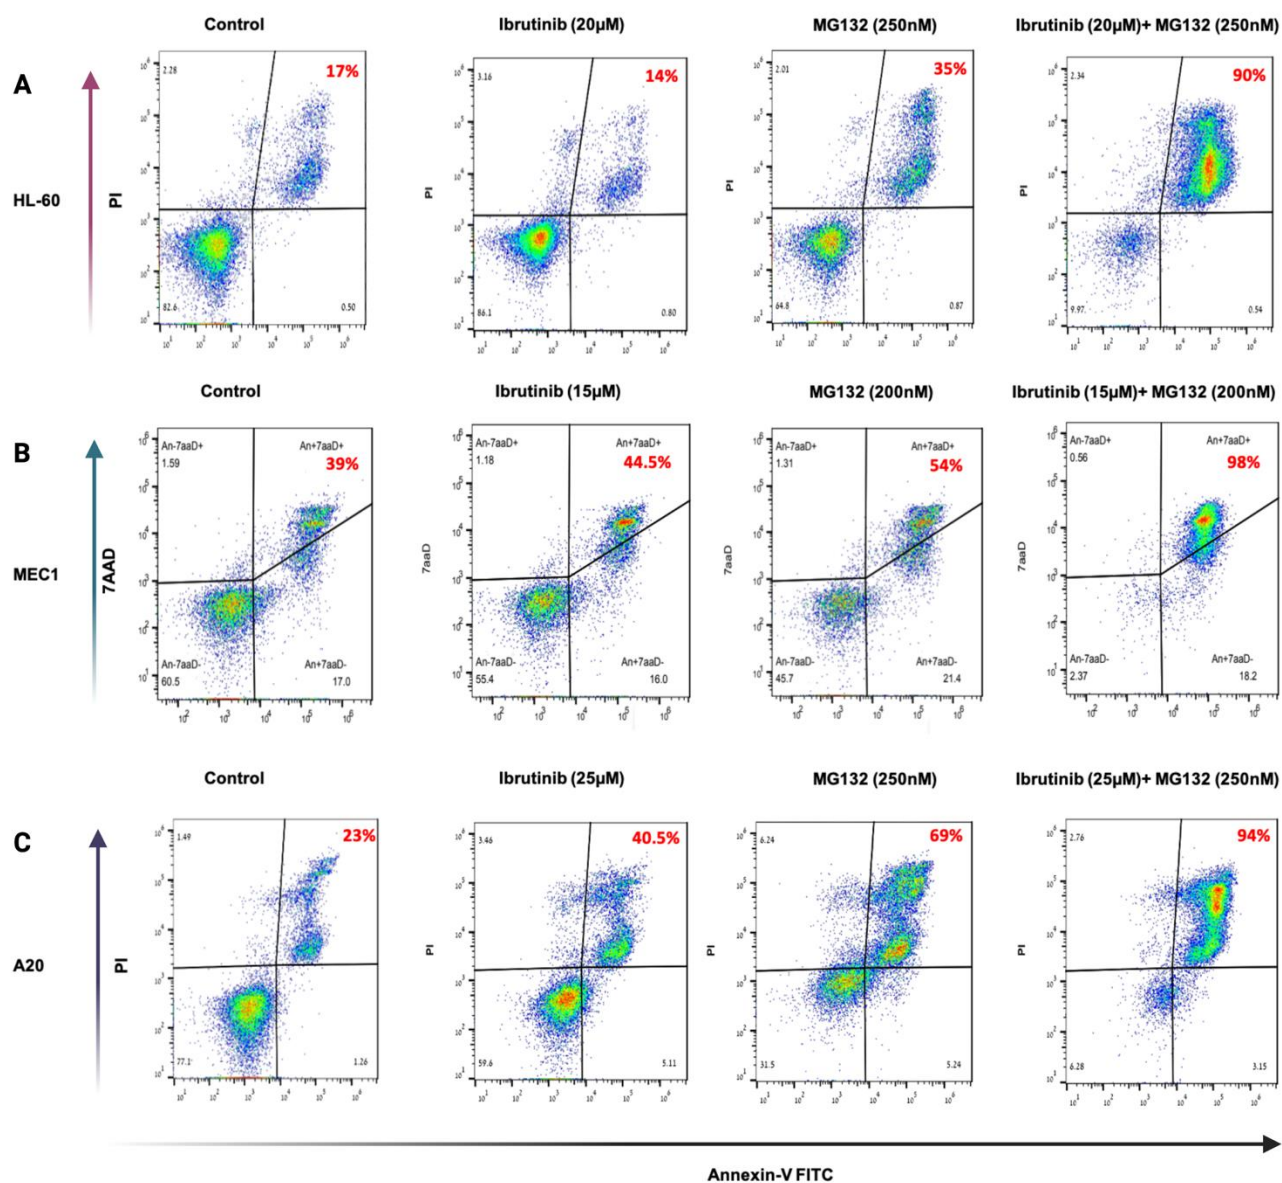

**Figure S3.** Raw data of the Annexin V tests described in Fig. 1C. (A) Effect of ibrutinib and MG132 on HL-60 (B) Effect of ibrutinib and MG132 on MEC1, (C) Effect of ibrutinib and MG132 on A20.

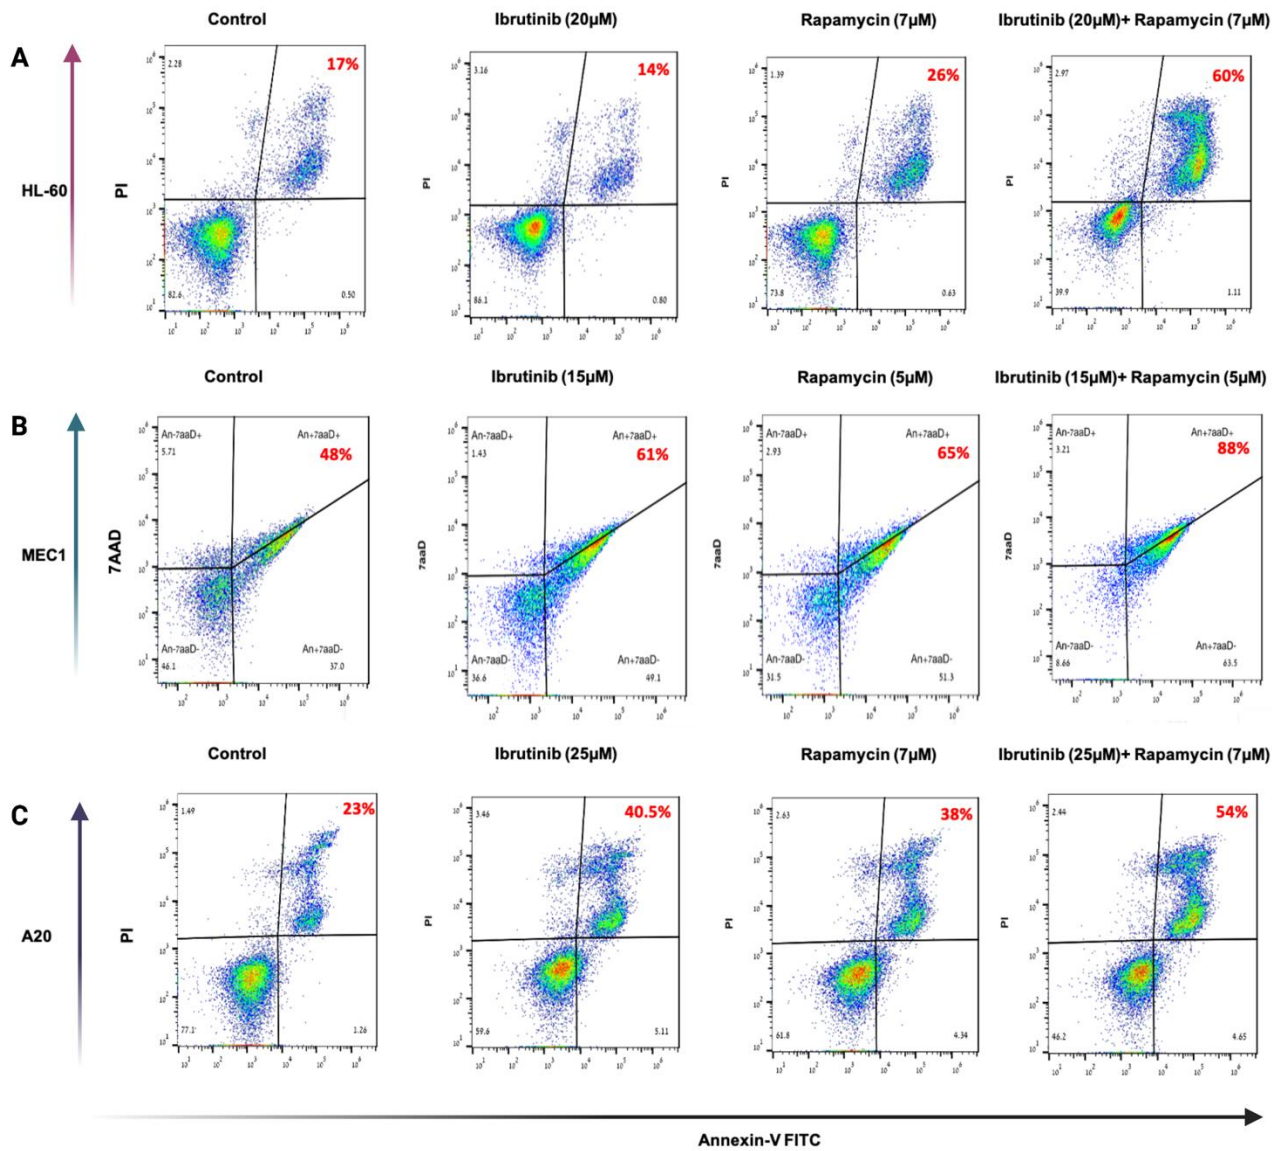

**Figure S4.** Raw data of the Annexin V tests described in Fig. 1C. (A) Effect of ibrutinib and Rapamycin on HL-60 (B) Effect of ibrutinib and Rapamycin on MEC1 (C) Effect of ibrutinib and Rapamycin on A20. Images for Controls in HL60 and A20 as well as Ibrutinib treatments are similar as described in Figure S4 as these are from the same experiments, we have used this data in this panel for representation and sidewise comparison.

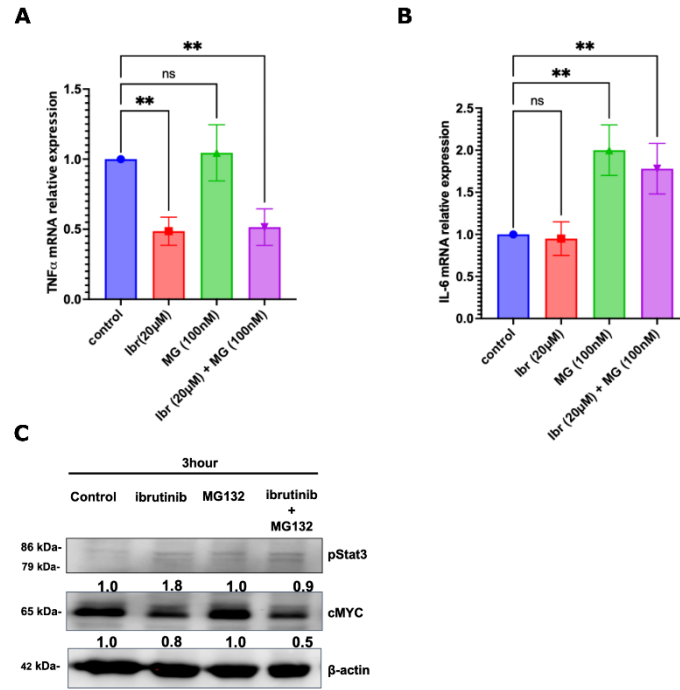

**Figure S5.** Relative normalized expression of **(A)** TNFα and **(B)** IL-6 mRNA in response to ibrutinib and MG132 was quantified through qPCR. The experiment was performed in biological triplicates (n=3), Statistical analysis for (A) and (B) was performed using one-way ANOVA. All statistical analysis was performed using Graphpad (v9), level of significance was taken as (“ns” < .1234, “\*\*”P” < .0021) as denoted appropriately on the above graphs. **(C)** MEC1 cells were treated with ibrutinib and MG132 or in combination, Levels of c-Myc and phospho-Stat3 were assessed by immunoblotting with antibodies, and Actin serves as a normalizing control.

**Table S1. and S2.** Sequences of primers used for amplifying the shRNA barcodes (**Table S1**) and for relevant genes expression (**Table S2**).

**Table S1.** Sequences of first and second PCR primers.

| Primers                    | Sequence                                                                  |
|----------------------------|---------------------------------------------------------------------------|
| 1st PCR Forward            | 5'-TTCTCTGGCAAGCAAAAGACGGCATA-3'                                          |
| 1st PCR Reverse            | 5'-TAGCCAACGCATCGCACAAGCCA -3'                                            |
| 2nd PCR Reverse            | 5'-CCACTACGCCTCCGCTTCCTCTCTATGGGACGTCGGTGATAATGATACGGCGACCAC-<br>CGAGA-3' |
| 2nd PCR Forward Barcode 16 | 5'-CCATCTCATCCCTGCGTGTCTCCGACTCAGGTACGAGATCAAGCAGAAGACGGCAT-<br>ACGAGA-3' |
| 2nd PCR Forward Barcode 17 | 5'-CCATCTCATCCCTGCGTGTCTCCGACTCAGGTCGTAGATCAAGCAGAAGACGGCAT-<br>ACGAGA-3' |
| 2nd PCR Forward Barcode 18 | 5'-CCATCTCATCCCTGCGTGTCTCCGACTCAGGTCACGATCAAGCAGAAGACGGCAT-<br>ACGAGA-3'  |
| 2nd PCR Forward Barcode 19 | 5'-CCATCTCATCCCTGCGTGTCTCCGACTCAGCCATAGGATCAAGCAGAAGACGGCAT-<br>ACGAGA-3' |

**Table S2.** RT-PCR primers.

| Primers for  | Forward sequence              | Reverse sequence               |
|--------------|-------------------------------|--------------------------------|
| CHOP mouse   | 5'-CTGCCITTTACCTTGGAGAC-3'    | 5'-CGTTTCCTGGGGATGA-GATA-3'    |
| ATF4 mouse   | 5'-CCTGAACAGCGAAGTGTGG-3'     | 5'-TGGAGAACCCATGAGGTTTCAA-3'   |
| ATF3 mouse   | 5'-TTTGCTAACCTGACACCCTTG-3'   | 5'-AGAGGACATCCGATGGCAGA-3'     |
| HPRT-R mouse | 5'-TGTTGTTGGATATGCCCTTG-3'    | 5'-TTGCTCATCTTAGGCTTT-3'       |
| IL-6 human   | 5'-ACTCACCTCTTCAGAACGAATTG-3' | 5'-CCATCTTTGGAAGGTTTCAGGTTG-3' |
| TNFα human   | 5'-GATTCTGAGCAAAATAGCCAGCA-3' | 5'-GGCTTCCTTCTTGTGTGTGT-3'     |
| Actin human  | 5'-CATGTACGTTGCTATCCAGGC-3'   | 5'-CTCCTTAATGTACGCACGAT-3'     |

**Table S3.** A list of sensitized genes from statistical data is attached to an excel file (*Sensitizers\_genetic\_screen.xlsx*).

**Table S4.** List of significant pathways identified in the screen.

| NAME                               | FDR q-val    |
|------------------------------------|--------------|
| HALLMARK_MYC_TARGETS_V1            | 0            |
| HALLMARK_COAGULATION               | 0            |
| HALLMARK_OXIDATIVE_PHOSPHORYLATION | 0            |
| HALLMARK_COMPLEMENT                | 0            |
| HALLMARK_APOPTOSIS                 | 0            |
| HALLMARK_ALLOGRAFT_REJECTION       | 7.58E-04     |
| HALLMARK_MTORC1_SIGNALING          | 0.0010850341 |
| HALLMARK_DNA_REPAIR                | 0.0011429532 |
| HALLMARK_FATTY_ACID_METABOLISM     | 0.0036229694 |
| HALLMARK_PI3K_AKT_MTOR_SIGNALING   | 0.0038951442 |
| HALLMARK_INFLAMMATORY_RESPONSE     | 0.0036818024 |
| HALLMARK_IL6_JAK_STAT3_SIGNALING   | 0.0039023084 |
| HALLMARK_PEROXISOME                | 0.021172734  |
| HALLMARK_GLYCOLYSIS                | 0.019761236  |
| HALLMARK_CHOLESTEROL_HOMEOSTASIS   | 0.025605407  |

**Table S5.** List of nine FDA approved drugs that were tested for synergy with ibrutinib, related inhibition pathways and genes from the screen.

| Drug                     | The inhibition Pathway | Genes from our screen involved in the pathway   |
|--------------------------|------------------------|-------------------------------------------------|
| Hydroxychloroquine (HQC) | Autophagy              | TNF, IL6, TNFAIP3, TRAF1, TRAF4, NFKB1, NFKB2   |
| Tofacitinib              | JAK-STAT               | JAK2, STAT3, STAT2, GPR1                        |
| SP600125                 | JNK                    | MAPK8IP1, TNF, IL6                              |
| SB239063                 | p38 MAPK               | NFKB1, NFAT                                     |
| Fx 9847                  | DYRK                   | PTEN, CYCS, DYRK1B                              |
| Ex 527                   | SIRT1                  | SIRT1, SIRT2, TP53, CDK2, PLAG2A                |
| 17-AAG                   | HSP90                  | HSP90AB1, CASP3, HDAC9, PARP1, PARP2            |
| MG132                    | Ubiquitin-proteasome   | PSMA1, PSMA6, PSMA7, PSMD7, PSMD8, PSMB2, PSMB3 |
| Rapamycin                | mTORC1                 | RPTOR, RPS6KA1, EIF4E                           |

**Table S6.** Synergy results of sub-toxic concentrations of the drugs with ibrutinib.

| Drug                     | Sub-toxic concentration | Synergy with 15μM ibrutinib |
|--------------------------|-------------------------|-----------------------------|
| Hydroxychloroquine (HQC) | 30μM                    | +                           |
| Tofacitinib              | 10μM                    | -                           |
| SP600125                 | 10μM                    | -                           |
| SB239063                 | 10μM                    | -                           |
| Fx9847                   | 2μM                     | -                           |
| Ex527                    | 10μM                    | -                           |
| 17-AAG                   | 100nM                   | -                           |
| MG132                    | 100nM                   | +                           |
|                          | 300nM                   | +++                         |
| Rapamycin                | 5-10μM                  | ++                          |

**Table S7.** Combination Index.

| Cell line | IC50                         | Combination Index |
|-----------|------------------------------|-------------------|
| HL-60     | Ibrutinib 20μM+MG132 150nM   | 0.95              |
| MEC1      | Ibrutinib 15μM+MG132 150nM   | 0.86              |
| HL-60     | Ibrutinib 20μM+Rapamycin 5μM | 0.91              |
| MEC1      | Ibrutinib 15μM+Rapamycin 5μM | 0.93              |

**Table S8.** Up-regulated pathways in response to ibrutinib in HL-60 cells.

| UPREGULATED PATHWAYS              | FDR   |
|-----------------------------------|-------|
| TNFA SIGNALING VIA NFKB           | 0.000 |
| P53 PATHWAY                       | 0.000 |
| HYPOXIA                           | 0.000 |
| APOPTOSIS                         | 0.001 |
| EPITHELIAL MESENCHYMAL TRANSITION | 0.006 |
| MTORC1 SIGNALING                  | 0.007 |
| DNA REPAIR                        | 0.007 |
| IL6 JAK STAT3 SIGNALING           | 0.039 |
| GLYCOLYSIS                        | 0.099 |
| PI3K AKT MTOR SIGNALING           | 0.126 |
| UNFOLDED PROTEIN RESPONSE         | 0.127 |
| TGF BETA SIGNALING                | 0.136 |
| KRAS SIGNALING                    | 0.163 |
| UV RESPONSE UP                    | 0.185 |
| XENOBIOTIC METABOLISM             | 0.187 |
| FATTY ACID METABOLISM             | 0.196 |
| IL2 STAT5 SIGNALING               | 0.250 |

**Table S9.** Down-regulated pathways in response to ibrutinib in HL-60 cells.

| DOWNREGULATED PATHWAYS             | FDR   |
|------------------------------------|-------|
| HALLMARK_OXIDATIVE_PHOSPHORYLATION | 0.092 |
| HALLMARK_E2F_TARGETS               | 0.126 |
